# Supplementary material for: Two Dimensional-Difference in Gel Electrophoresis (2D-DIGE) Proteomic Approach for the Identification of Biomarkers in Endometrial Cancer Serum
Source: MDPI journal article supplement (doi:10.3390/cancers13143639), 2021-07-20
Supplement: s1 [file s1]

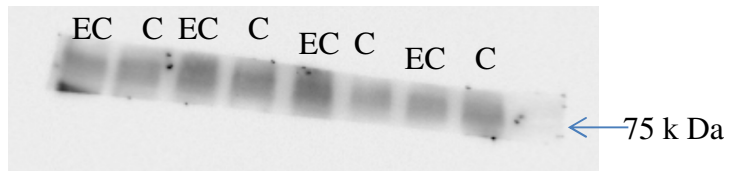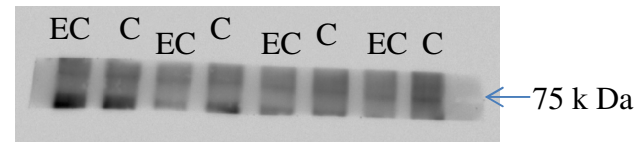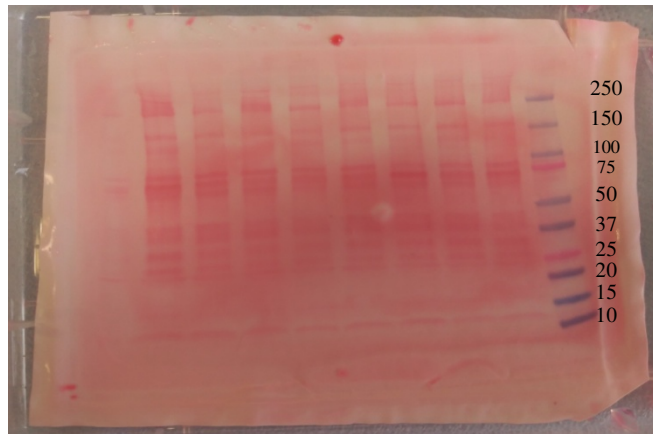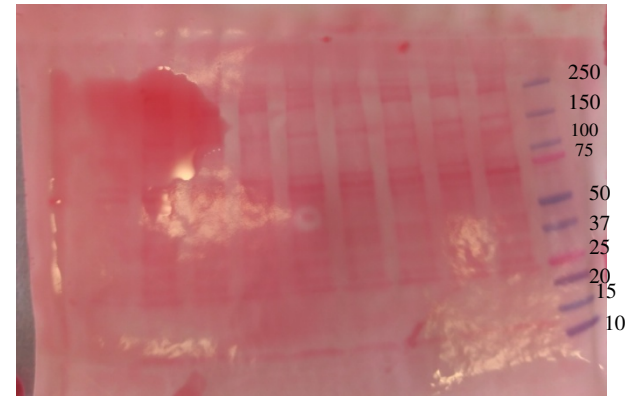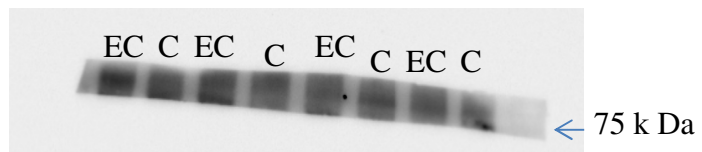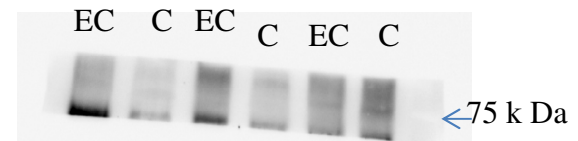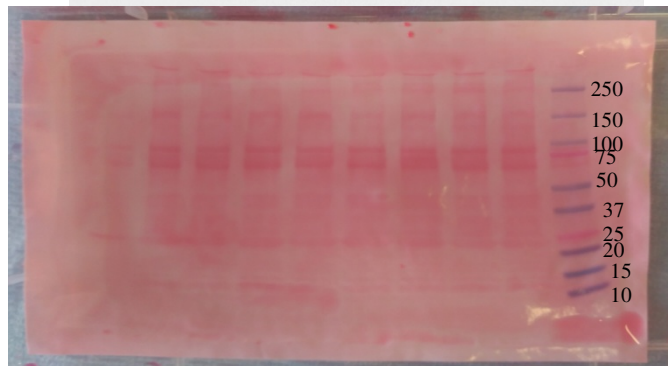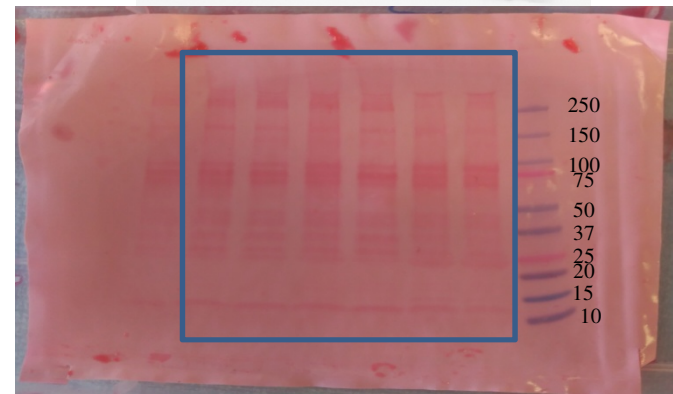

Whole membrane of C1R protein from depeted serum

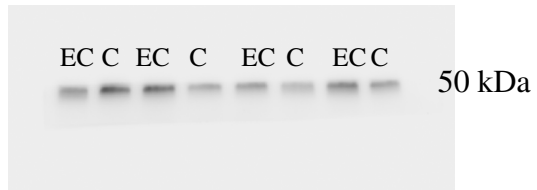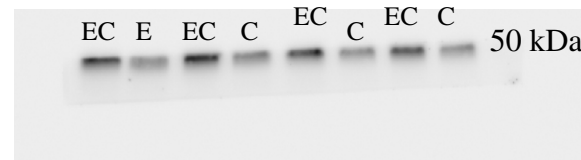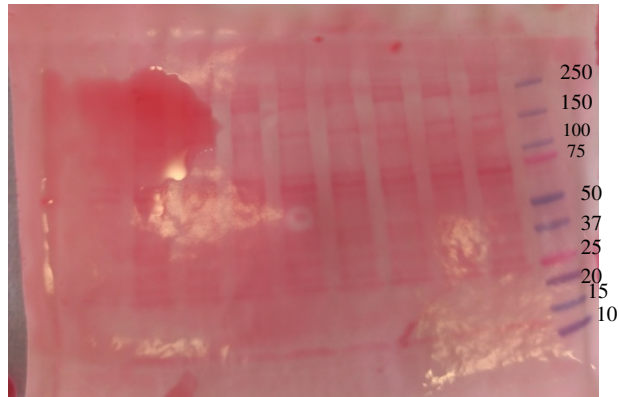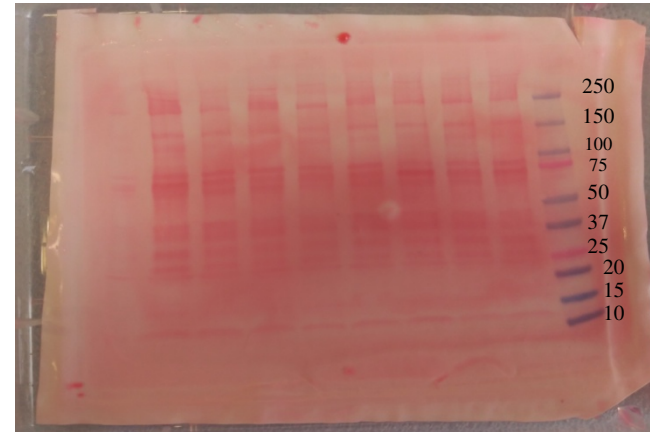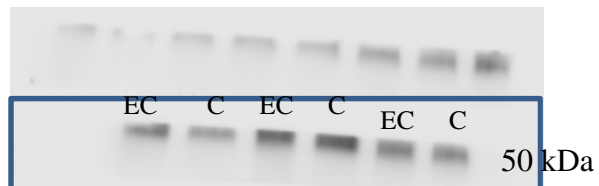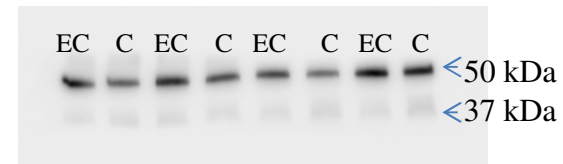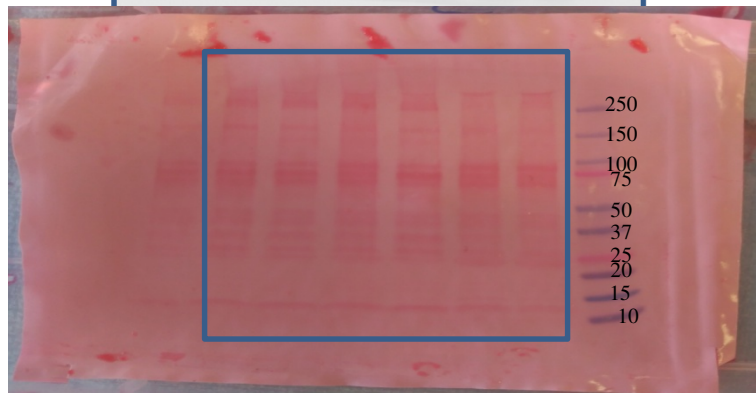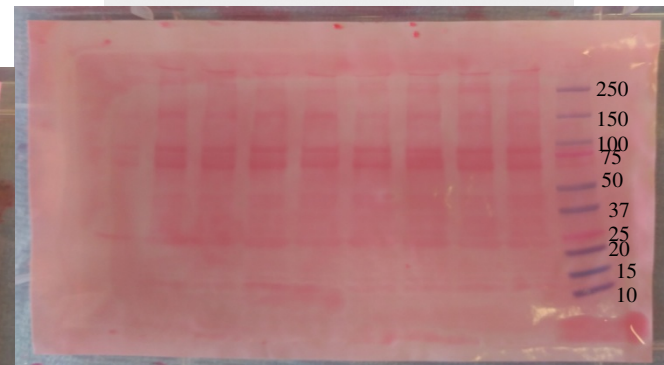

Whole membrane of Serpine1 protein from depleted serum

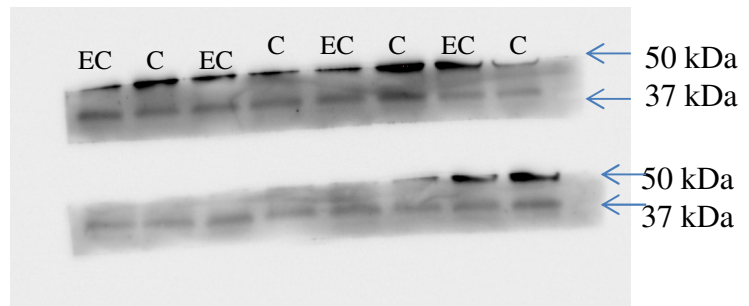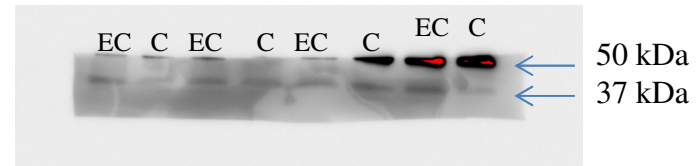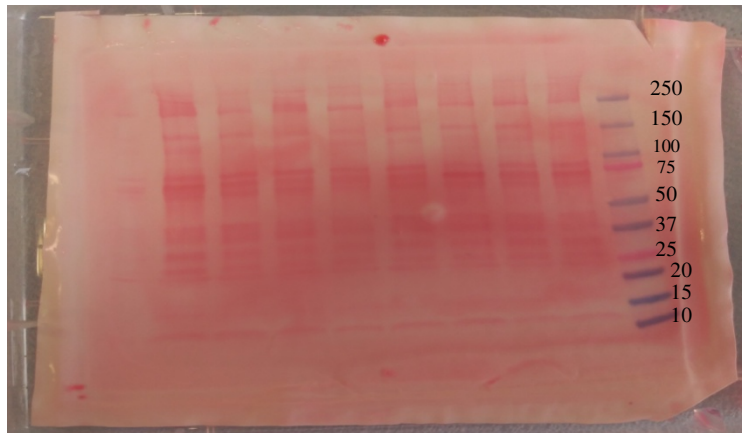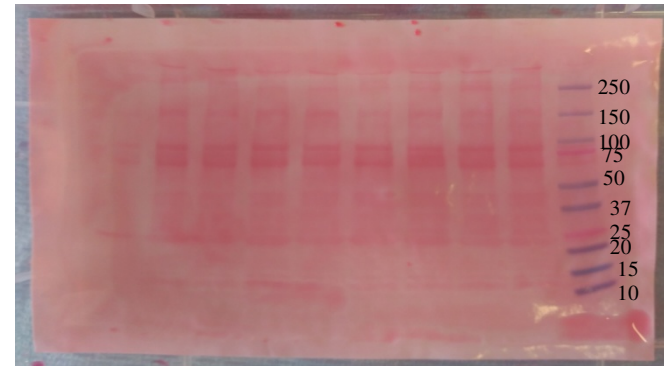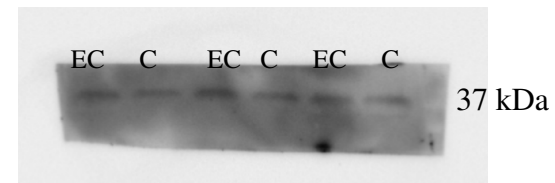

Whole membrane of CLU protein  
from depeted serum

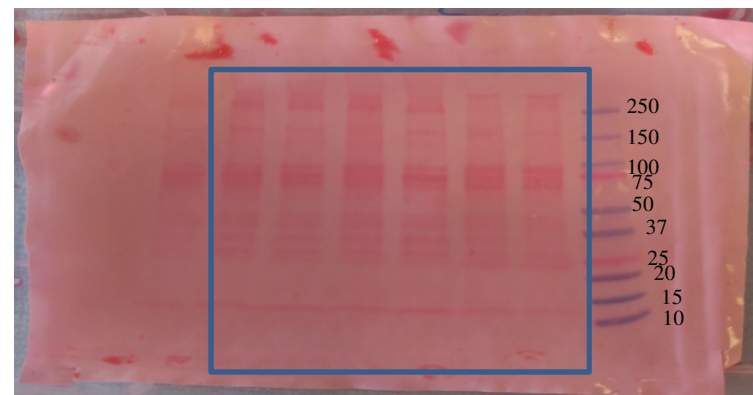



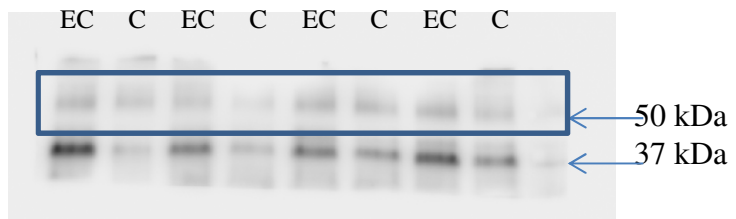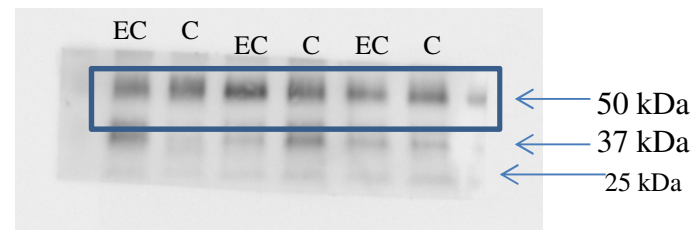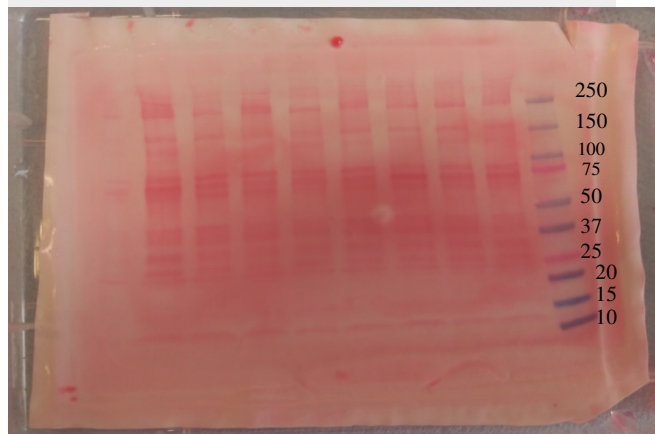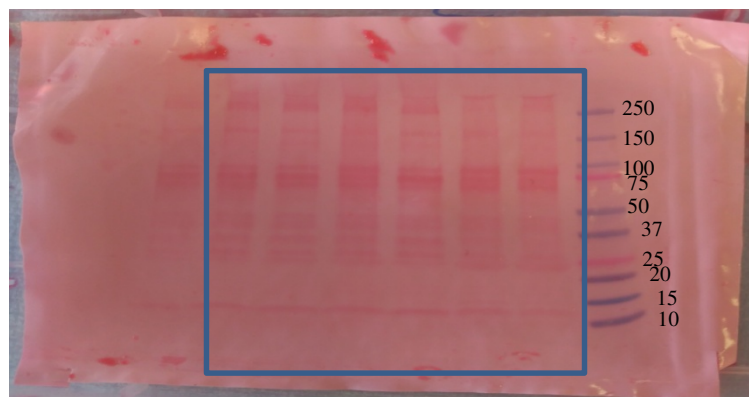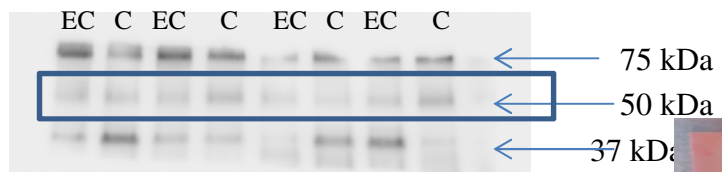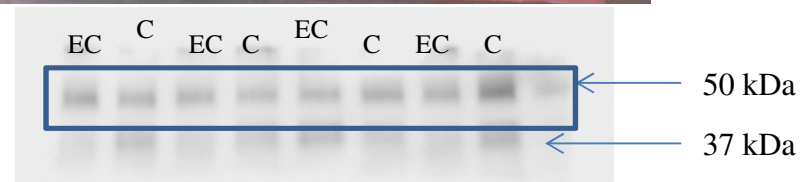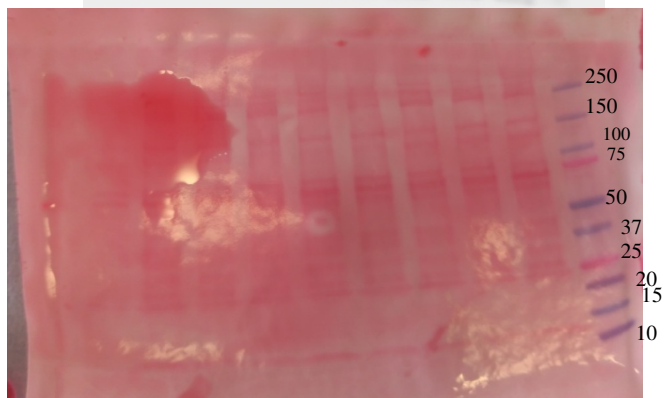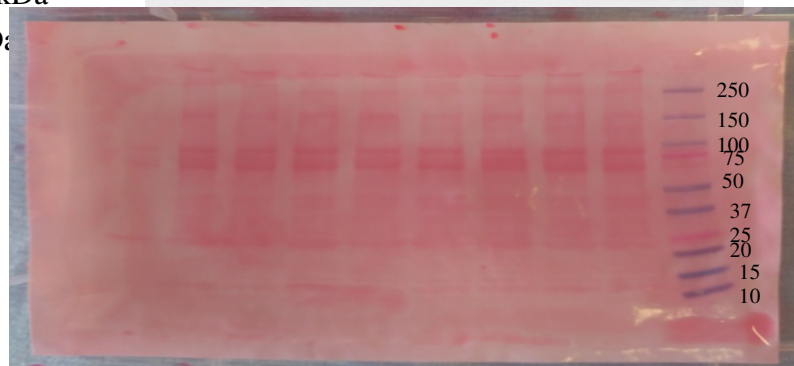

Whole membrane of ITIH4 protein from depleted serum

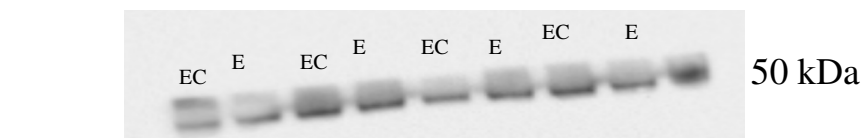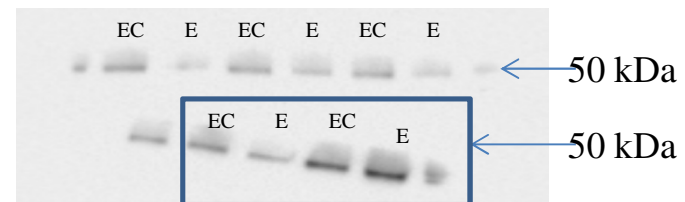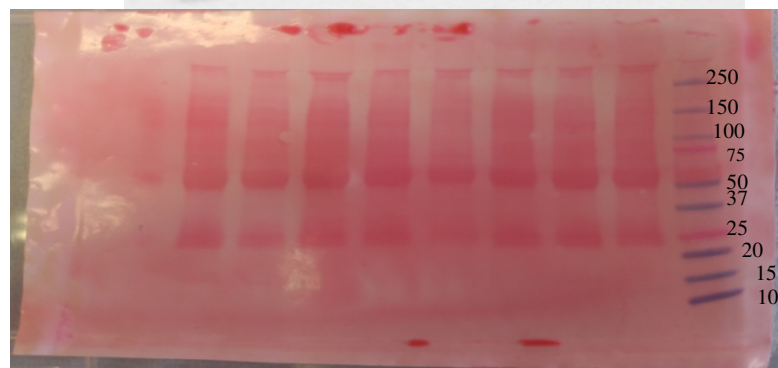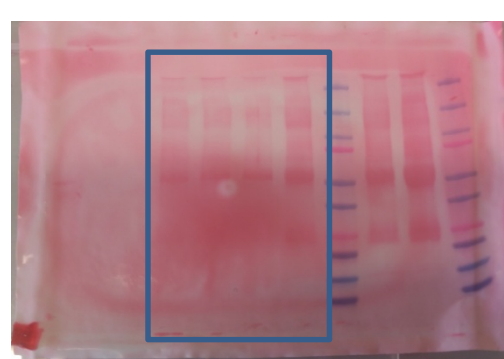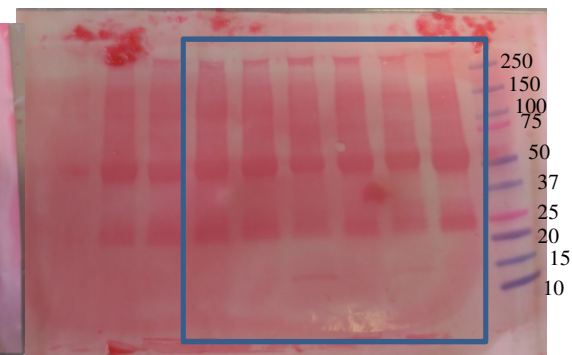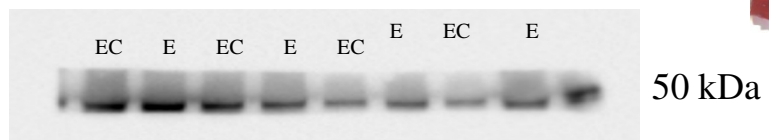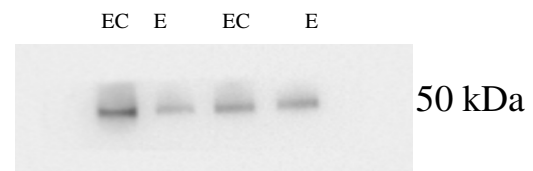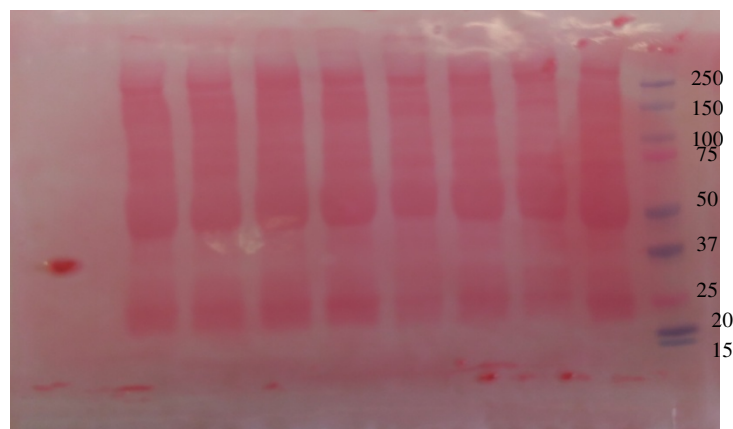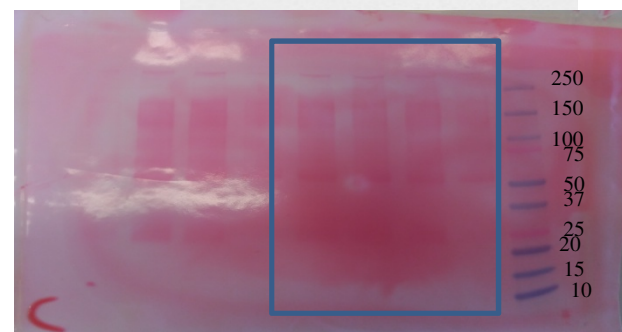

Whole membrane of Serpine1 protein from exosome

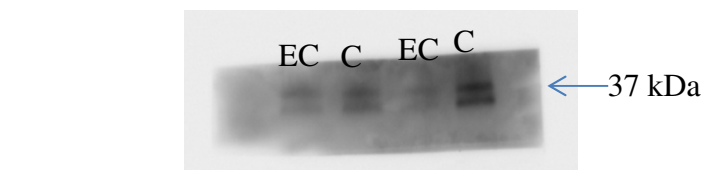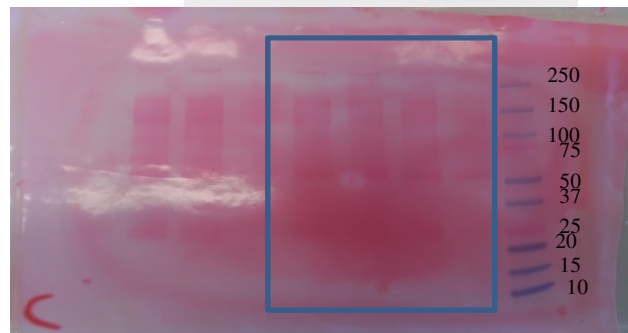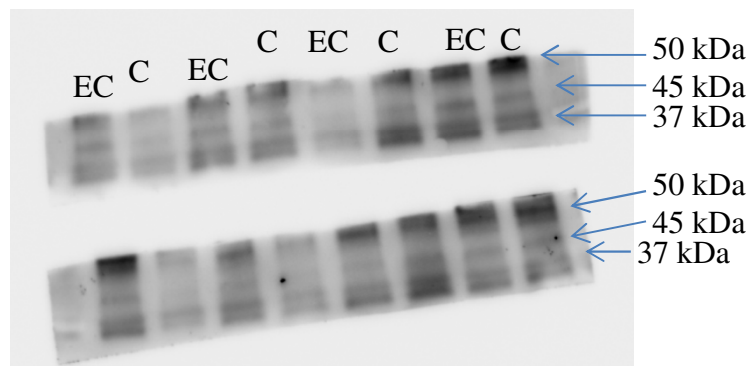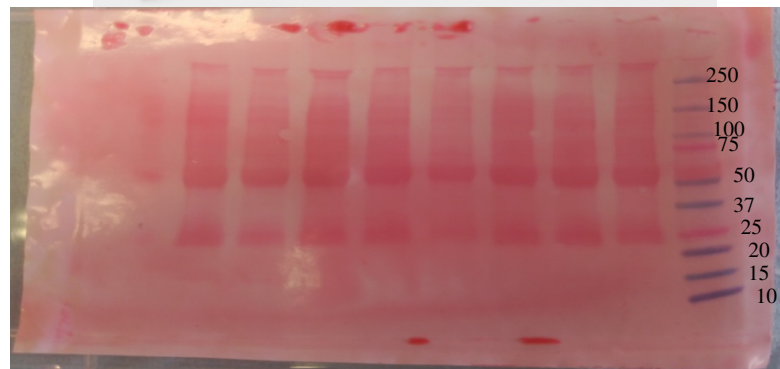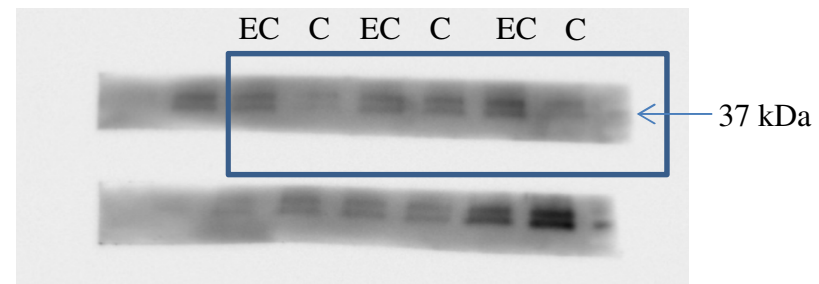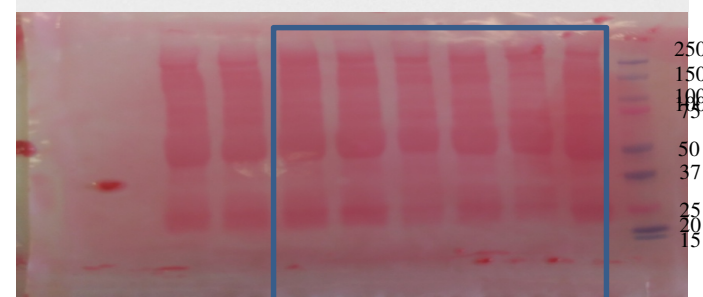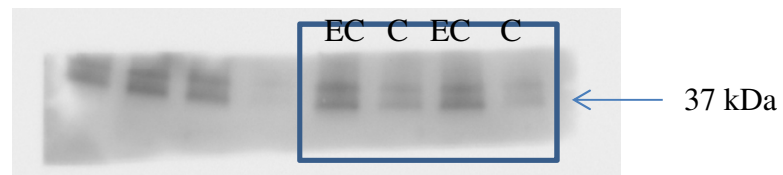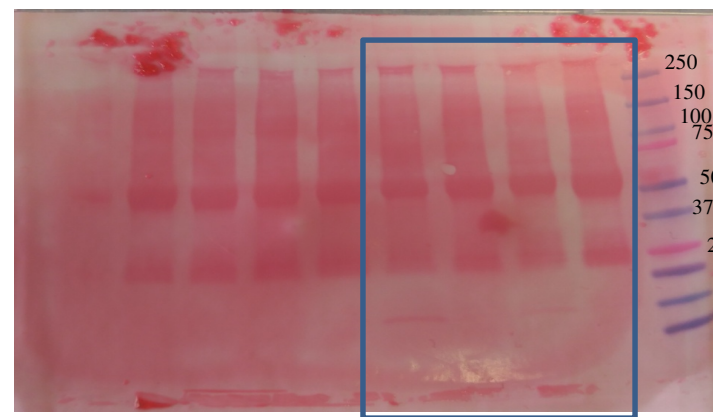

Whole membrane of CLU protein from exosome



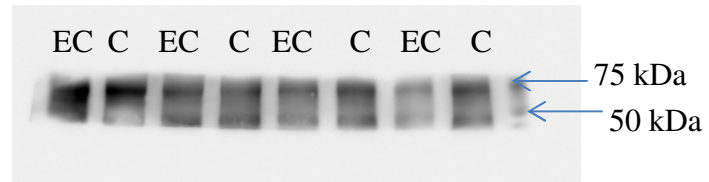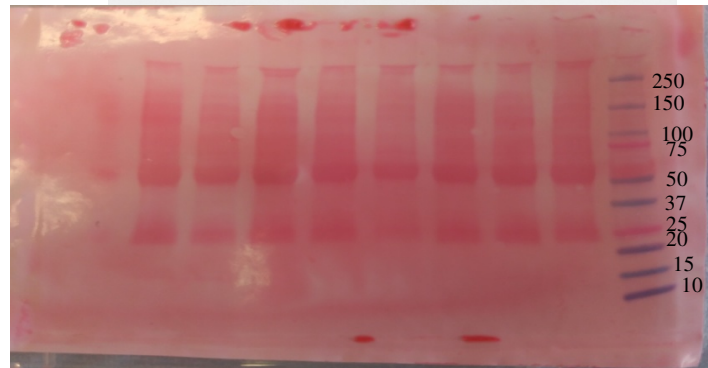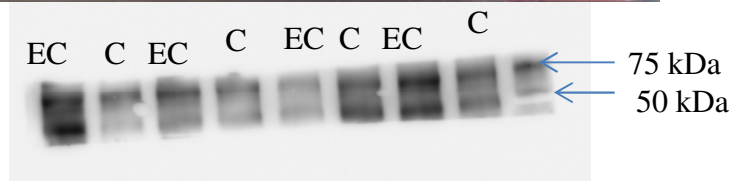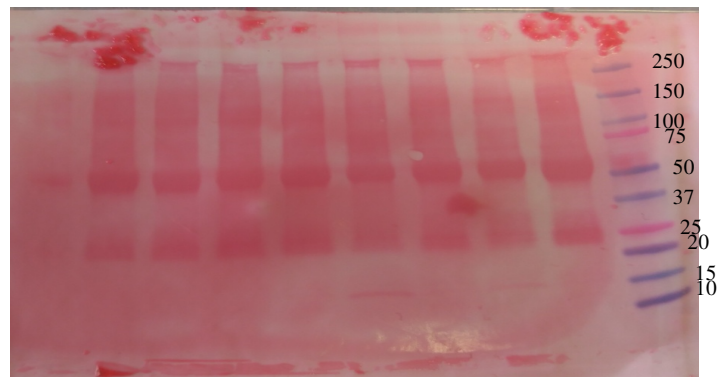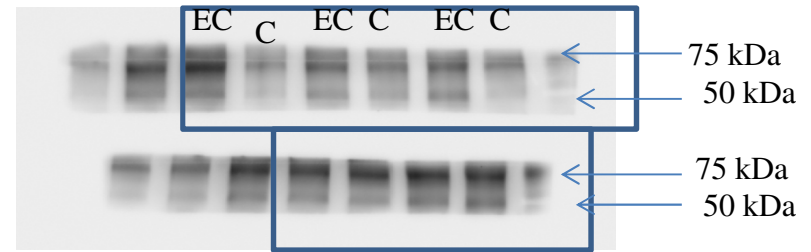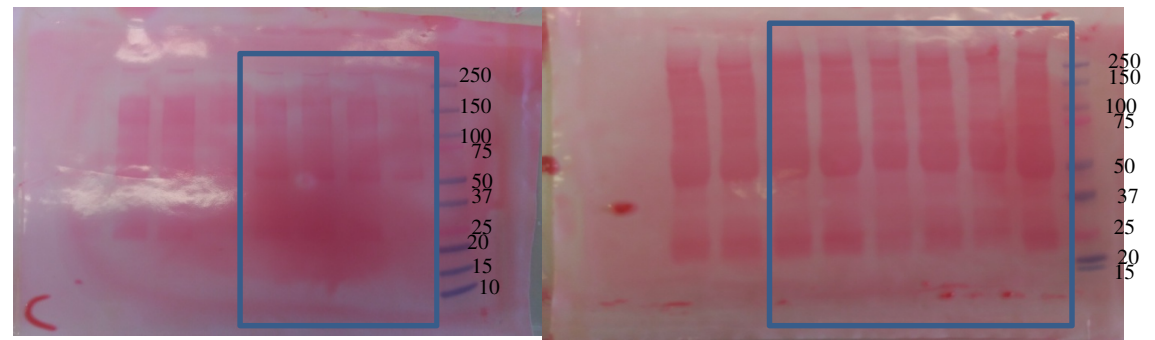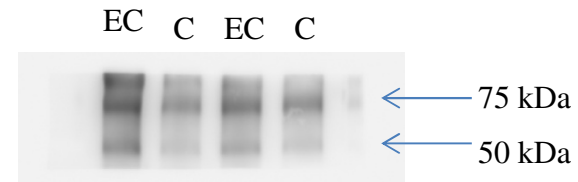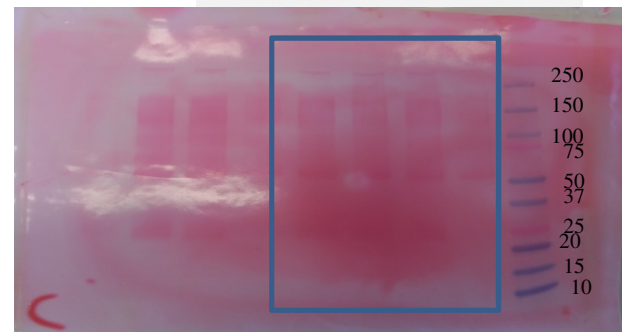

Whole membrane of C1R protein from exosome

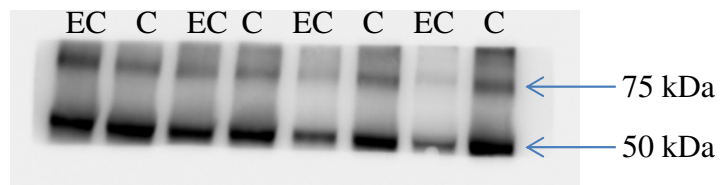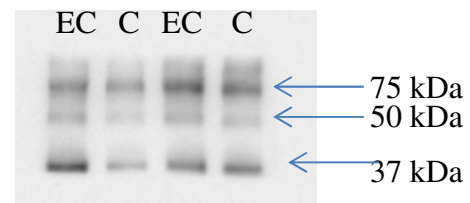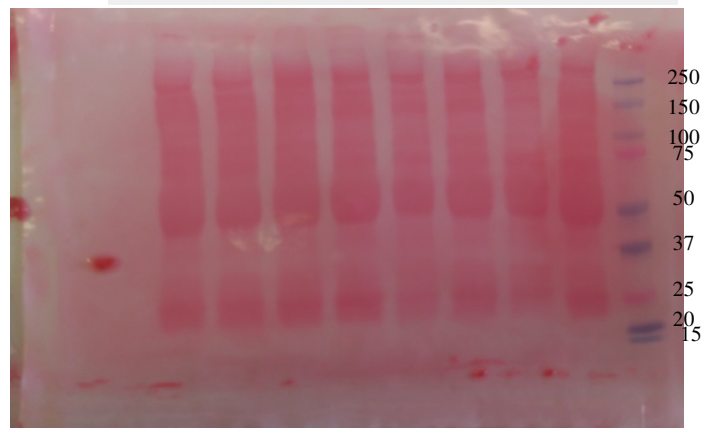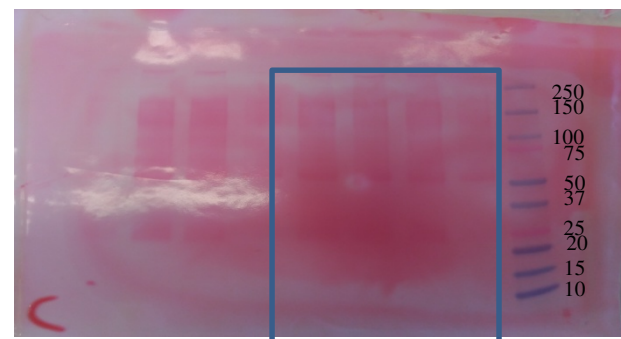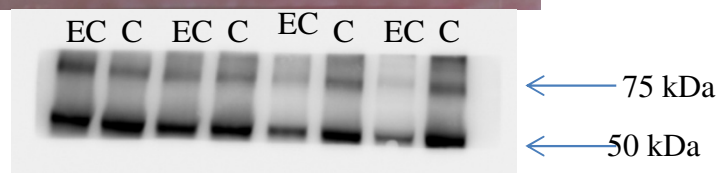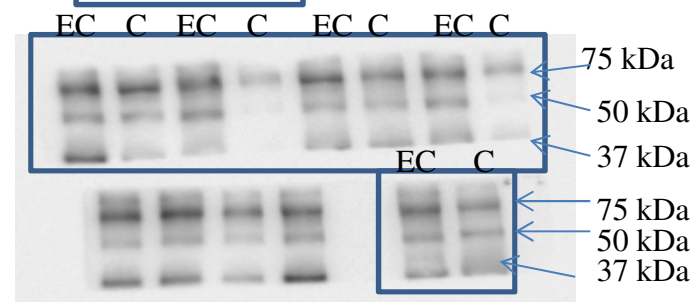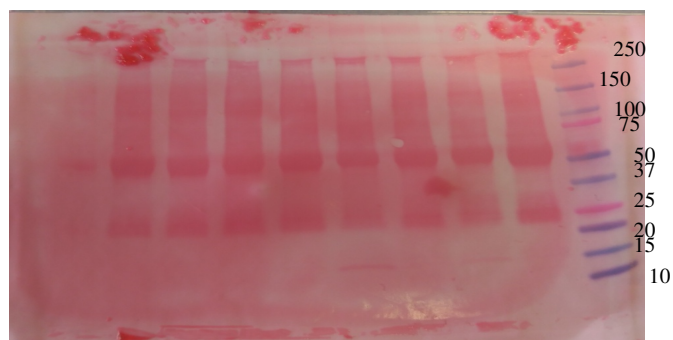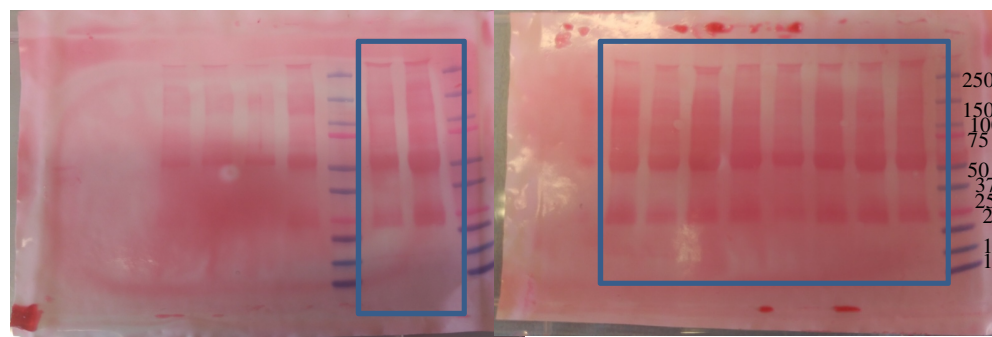

Whole membrane of ITIH4 protein from exosome
